# Supplementary material for: Ultra-low-k cyclic carbon-bridged PMO films with a high chemical resistance
Source: Royal Society of Chemistry journal article supplement (doi:10.1039/c2jm30312d), 2012-01-01
Supplement: c2jm30312d.pdf [file c2jm30312d.pdf]

## Supplementary Information

### $^1\text{H}$ NMR - 300 MHz - $\text{CDCl}_3$

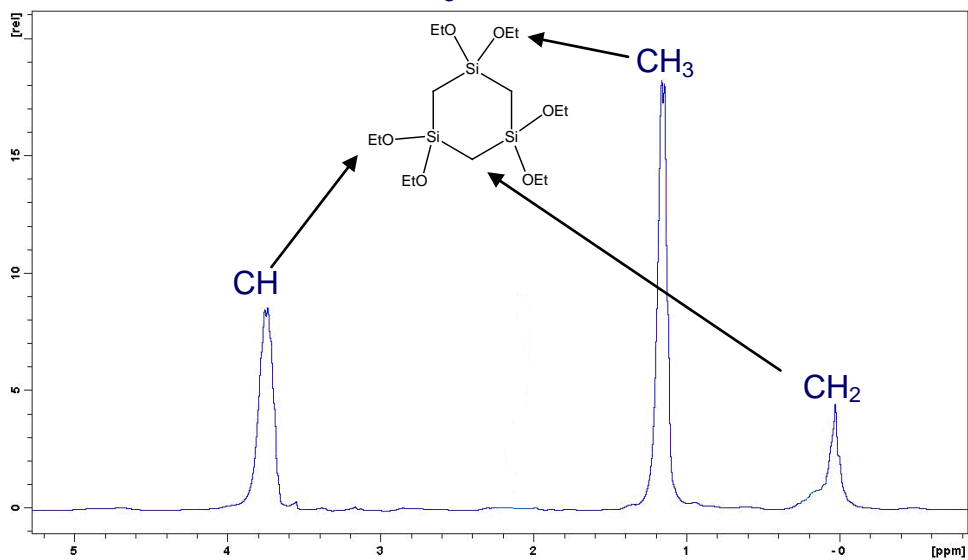

**Figure S1.**  $^1\text{H}$  NMR spectrum of 1,3,5[tris(diethoxy)sila]cyclohexane.

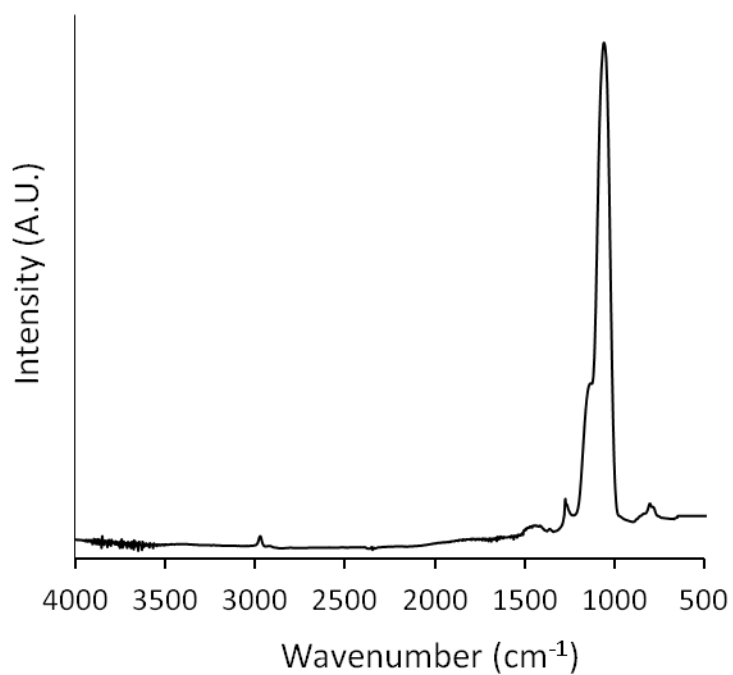

**Figure S2.** DRIFT spectrum of the NaOH treated RPMO-Brij film after annealing.

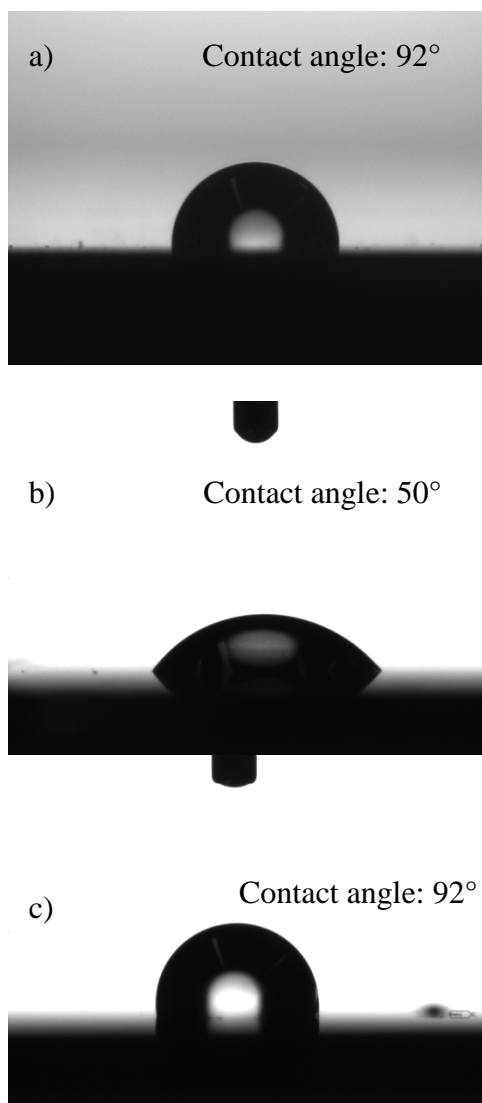

**Figure S3.** Water droplet images of a) the pristine PMO film, b) the dried PMO film after immersion in a pH 14 solution for 5 min. and c) the annealed PMO film after immersion.
